# Supplementary material for: Zerumbone ameliorates high-fat diet-induced adiposity by restoring AMPK-regulated lipogenesis and microRNA-146b/SIRT1-mediated adipogenesis
Source: PubMed Central journal article supplement (PMC5514886; doi:10.18632/oncotarget.16974), 2017-04-08
Supplement: oncotarget-08-36984-s001.pdf [file oncotarget-08-36984-s001.pdf]

## Zerumbone ameliorates high-fat diet-induced adiposity by restoring AMPK-regulated lipogenesis and microRNA-146b/SIRT1-mediated adipogenesis

### Supplementary Material

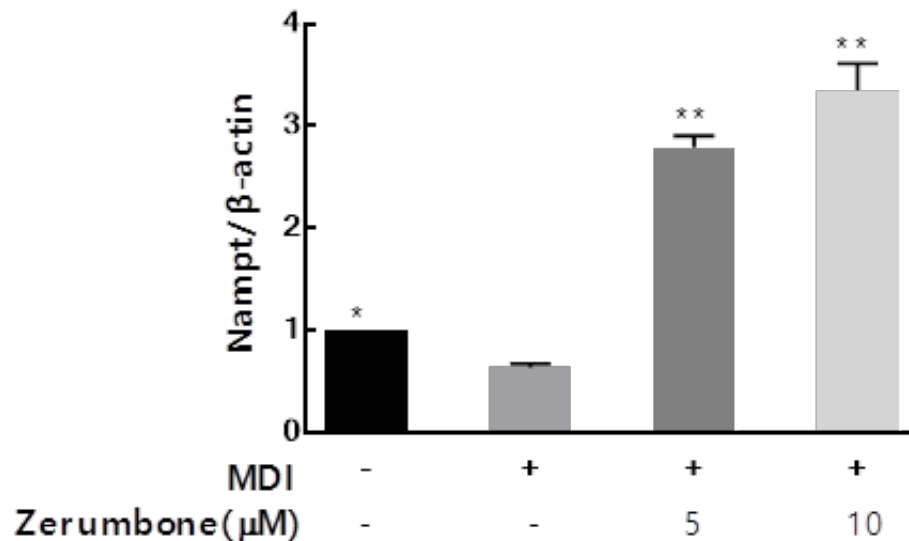

**Supplementary Figure 1: Effect of zerumbone on NANMP mRNA levels.** 3T3-L1 cells were treated with 5 or 10 μM zerumbone for 48 h at day 0 and differentiated.

**Supplementary Table 1: Diet compositions**

| <b>Component (g)</b>      | <b>NC</b> | <b>HF</b> | <b>HF+ZL</b> | <b>HF+ZH</b> |
|---------------------------|-----------|-----------|--------------|--------------|
| <b>Casein</b>             | 200       | 200       | 200          | 200          |
| <b>Corn oil</b>           | 50        | 50        | 50           | 50           |
| <b>Lard</b>               | -         | 50        | 50           | 50           |
| <b>Cholesterol</b>        | -         | 5         | 5            | 5            |
| <b>Cocoa butter</b>       | -         | 70        | 70           | 70           |
| <b>Coconut oil</b>        | -         | 30        | 30           | 30           |
| <b>Corn starch</b>        | 350       | 195       | 195          | 195          |
| <b>Sucrose</b>            | 300       | 300       | 300          | 300          |
| <b>Cellulose</b>          | 50        | 50        | 50           | 50           |
| <b>Mineral mix</b>        | 35        | 35        | 35           | 35           |
| <b>Vitamin mix</b>        | 10        | 10        | 10           | 10           |
| <b>Methionine</b>         | 3         | 3         | 3            | 3            |
| <b>Choline bitartrate</b> | 2         | 2         | 2            | 2            |
| <b>Zerumbone</b>          | -         | -         | 0.1          | 0.25         |

**Supplementary Table 2: The primers and reaction conditions.**

| Gene           | NCBI accession number | Primer (5'→3')                |
|----------------|-----------------------|-------------------------------|
| C/EBP $\alpha$ | NM_007678.3           | F : CCTTCAACGACGAGTTCCTG      |
|                |                       | R : TGGCCTTCTCCTGCTGTC        |
| PPAR $\gamma$  | NM_001127330.1        | F : CTGGCCTCCCTGATGAATAA      |
|                |                       | R : GGCGGTCTCCACTGAGAATA      |
| Ap2            | NM_024406.2           | F : CCGCAGACGACAGGA           |
|                |                       | R : CTCATGCCCTTTCATAAACT      |
| PDK4           | NM_013743.2           | F : AGGGAGGTCGAGCTGTTCTC      |
|                |                       | R : GGAGTGTTCACTAAGCGGTCA     |
| CPT-1 $\alpha$ | NM_013495.2           | F : CTCCGCCTGAGCCATGAAG       |
|                |                       | R : CACCAGTGATGATGCCATTCT     |
| MCAD           | NM_007382.5           | F : GGCAAATGCCTGTGATTCTT      |
|                |                       | R : ACCCATTGCGATCTTGAAAC      |
| LCAD           | NM_172678.3           | F : TCCAGAGGTCAGTCAACATGA     |
|                |                       | R : CCTGGTCAATTTTCGAGAGTCC    |
| GPAT           | NM_008149.3           | F : CCTTCCATTTTCAGTGTGCAGA    |
|                |                       | R : ACAGTTGGCACAATAGACGTTT    |
| DGAT           | NM_026384.3           | F : AGTGGCAATGCTATCATCATCGT   |
|                |                       | R : AAGGAATAAGTGGGAACCAGA TCA |
| LPL            | NM_008509.2           | F : GGGAGTTTGCTCCAGAGTTT      |
|                |                       | R : TGTGTCTTCAGGGTCTTAG       |
| FASN           | NM_007988.3           | F : GGAGGTGGTGATAGCGGCTAT     |
|                |                       | R : TGGGTAATCCATAGAGCCAG      |
| CD36           | NM_001159555.1        | F : GATGACGTGGCAAAGAACAG      |
|                |                       | R : AAAGGAGGCTGCGTCTGTG       |
| NAMPT          | NM_021524.2           | F : CCCGATTGAAGTAAAGGCTGT     |
|                |                       | R : TGGTAAGCCAGTAGCACTCTG     |

Ap2, Adipocyte protein 2; C/EBP $\alpha$ , CCAAT enhancer binding protein alpha; PPAR $\gamma$ , peroxisome proliferator-activated receptor gamma; FASN, fatty acid synthase; LPL, lipoprotein lipase; CD36, Cluster of Differentiation 36; MCAD, medium-chain acyl-CoA dehydrogenase; LCAD, long-chain acyl-CoA dehydrogenase; PDK4, pyruvate dehydrogenase kinase, isozyme 4; GPAT, glycerol-3-phosphate acyltransferase; DGAT, diacylglycerol acyltransferase; CPT-1  $\alpha$ , carnitine palmitoyltransferase-1 alpha
